# Supplementary material for: Liquid–liquid extraction process of amino acids by a new amide-based functionalized ionic liquid
Source: Royal Society of Chemistry journal article supplement (doi:10.1039/c2gc16560k), 2012-01-01
Supplement: c2gc16560k.pdf [file c2gc16560k.pdf]

## Supporting information Figure Captions:

**S.Fig.1**  $^1\text{H}$  NMR spectrum of  $[\text{EimCH}_2\text{CONHBu}]\text{Cl}$

**S.Fig.2**  $^{13}\text{C}$  NMR spectrum of  $[\text{EimCH}_2\text{CONHBu}]\text{NTf}_2$

**S.Fig.3**  $^1\text{H}$  NMR spectrum of  $[\text{EimCH}_2\text{CONHBu}]\text{NTf}_2$

**S.Fig.4**  $^1\text{H}$  NMR spectrum of Recycled  $[\text{EimCH}_2\text{CONHBu}]\text{NTf}_2$

S.Fig.1

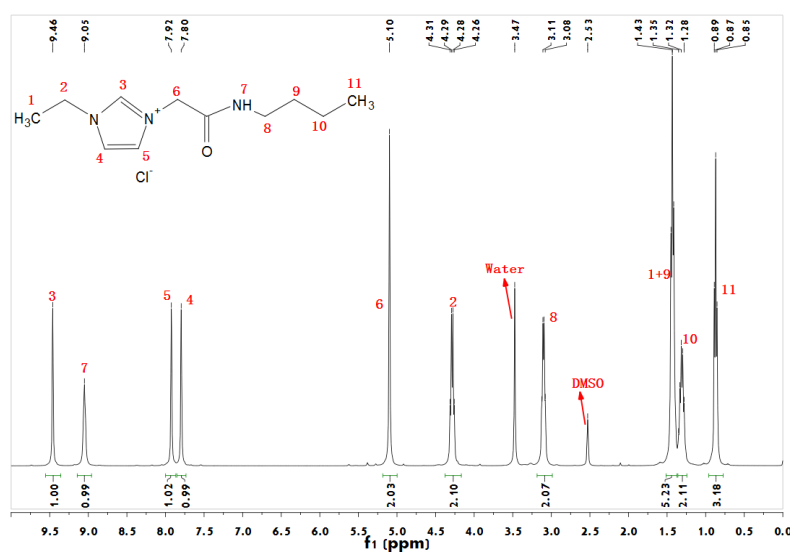

Fig.1  $^1\text{H}$  NMR spectrum of  $[\text{EimCH}_2\text{CONHBu}]\text{Cl}$

S.Fig.2

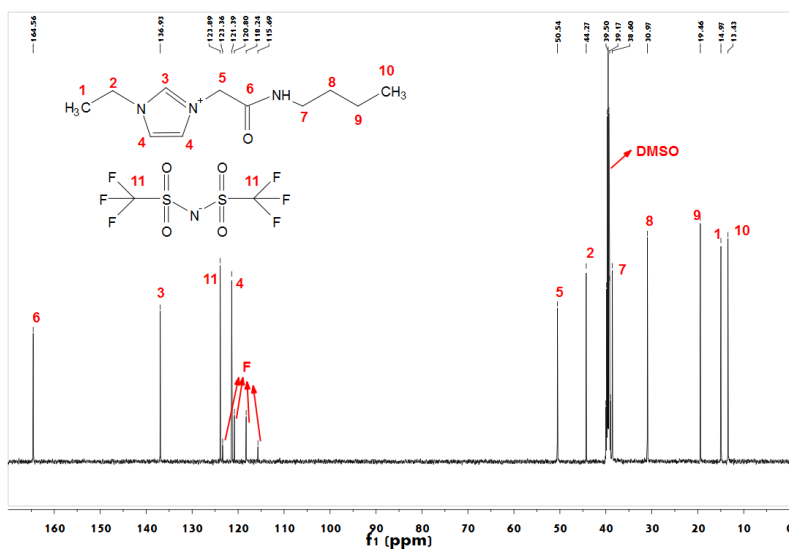

Fig.2 <sup>13</sup>C NMR spectrum of [EimCH<sub>2</sub>CONHBu]NTf<sub>2</sub>

S.Fig.3

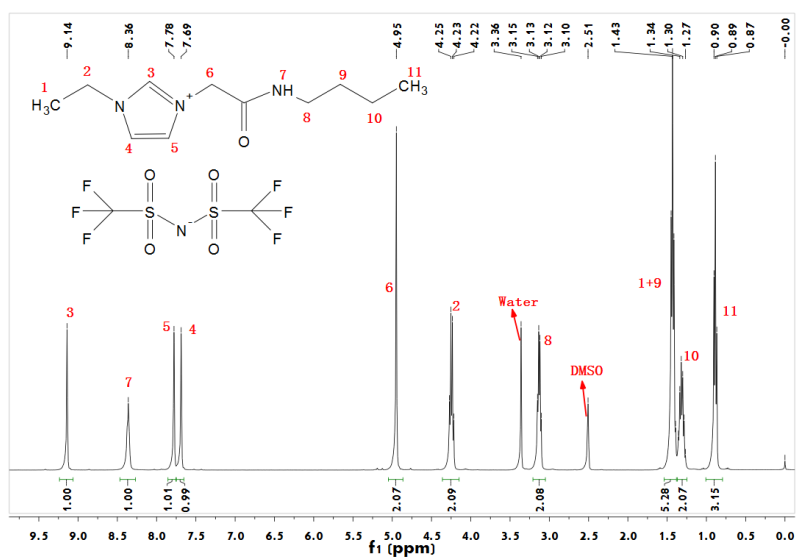

Fig.3  $^1\text{H}$  NMR spectrum of  $[\text{EimCH}_2\text{CONHBU}]\text{NTf}_2$

S.Fig.4

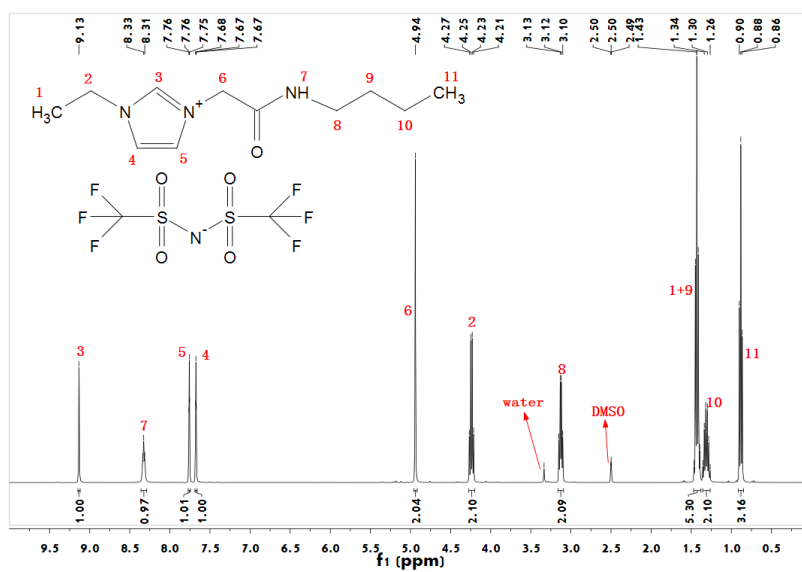

Fig.4  $^1\text{H}$  NMR spectrum of Recycled  $[\text{EimCH}_2\text{CONHBu}]\text{NTf}_2$
